# Supplementary material for: Climate change will accelerate the high-end risk of compound drought and heatwave events
Source: PubMed Central journal article supplement — Proc Natl Acad Sci U S A. 2023 Jul 3;120(28):e2219825120. doi: 10.1073/pnas.2219825120 (PMC10334742; doi:10.1073/pnas.2219825120), 2023-07-03
Supplement: pnas.2219825120.sapp.pdf [file pnas.2219825120.sapp.pdf]

1 Supporting Information

2 **Climate Change will Accelerate the High-End Risk of Compound Drought and Heatwave Events**

3  
4  
5  
6  
7  
8  
9  
10  
11  
12  
13  
14 **Kumar Puran Tripathy<sup>1</sup>, Sourav Mukherjee<sup>1</sup>, \*Ashok Kumar Mishra<sup>1</sup>, Michael E.**  
15 **Mann<sup>2</sup>, A. Park Williams<sup>3,4</sup>**

16 <sup>1</sup>Glenn Department of Civil Engineering, Clemson University, South Carolina, USA.

17 <sup>2</sup>Department of Earth & Environmental Science, University of Pennsylvania, PA, USA.

18 <sup>3</sup>Department of Geography, University of California, Los Angeles, CA 90095

19 <sup>4</sup>Lamont-Doherty Earth Observatory of Columbia University, Palisades, NY 10096

20  
21 Corresponding author: Ashok Kumar Mishra ([ashokm@g.clemson.edu](mailto:ashokm@g.clemson.edu))

22

24 **A1. Nonstationary Bias Correction**

25 The daily precipitation and daily temperature ( $T_{\max}$  and  $T_{\min}$ ) GCM datasets need to be bias  
 26 corrected to obtain more robust and reliable estimates for the future. The present paper used the  
 27 non-stationary bias correction technique – updated nonstationary CDF matching (CNCDFm)  
 28 method, developed by Miao et al. (2016)<sup>1</sup>. This method is an improvement over the traditional  
 29 quantile mapping approach to correct the GCM outputs. The CNCDFm method, which is a  
 30 combination of EDCDFm (Equidistant CDF matching) and equiratio CDFm<sup>2</sup>, treats temperature  
 31 and precipitation data separately, thus avoiding the problem of obtaining unreasonably high  
 32 values of daily precipitation values.

33 The bias-correction for temperature data can be mathematically written as,

$$34 \quad \tilde{x}_{m-p.adjust} = x_{m-p} + F_{o-c}^{-1} \left( F_{m-p} \left( x_{m-p} \right) \right) - F_{m-c}^{-1} \left( F_{m-p} \left( x_{m-p} \right) \right) \quad (1)$$

35 The bias correction for precipitation data is as follows,

$$36 \quad \tilde{x}_{m-p.adjust} = \begin{cases} I(x) & \text{if } I(x) > 0 \\ g(x) & \text{if } I(x) < 0 \\ 0 & \text{if } x_{m-p} = 0 \end{cases} \quad (2)$$

$$37 \quad I(x) = x_{m-p} + F_{o-c}^{-1} \left( F_{m-p} \left( x_{m-p} \right) \right) - F_{m-c}^{-1} \left( F_{m-p} \left( x_{m-p} \right) \right) \quad (3)$$

38 and,

$$39 \quad I(x) = x_{m-p} \times \frac{F_{o-c}^{-1} \left( F_{m-p} \left( x_{m-p} \right) \right)}{F_{m-c}^{-1} \left( F_{m-p} \left( x_{m-p} \right) \right)} \quad (4)$$

40 Where,  $x$  is the meteorological variable (temperature or precipitation) of interest for observation

41 ( $o$ ) or model ( $m$ ) corresponding to historical observation period or current climate ( $c$ ), or for

42 projected future period ( $p$ ).  $F_{m-p}$  indicates the CDF of the model for future projection (Socio-  
 43 economic Pathways), and  $F_{o-c}^{-1}$  and  $F_{m-c}^{-1}$  indicate the inverse CDF functions (quantile mapping  
 44 functions) for observation and model scenarios for the recent observed period (1982-2019)  
 45 respectively.

## 46 **A2. Estimation of CDHW severity**

47 The estimation of CDHW severity in this paper is followed from the previous work by  
 48 Mukherjee and Mishra (2020)<sup>3</sup>. The severity of a particular CDHW day is calculated by taking  
 49 the product of the daily standardized values of maximum temperature (standardized w.r.t. the  
 50 interquartile range of  $T_{max}$  for the summer period of that year) and the sc-PDSI value  
 51 corresponding to that week ( $scPDSI_w$ ). Then, the severity of a CDHW event is calculated by  
 52 taking the cumulative sum of daily severity for each of the CDHW days corresponding to that  
 53 CDHW event, which is given in the equation as follows,

$$54 \quad CDHW_{S_i} = \sum_{d=1}^{d=D_i} \left( (-1 \times scPDSI_{w,i}) \times \left( \frac{T_{max_{d,i}} - T_{25p}}{T_{75p} - T_{25p}} \right) \right); D_i \geq 3, d \in w \quad (5)$$

55 Where,  $D_i$  is the number of CDHW days in the  $i^{th}$  CDHW event,  $d$  indicates the heatwave days  
 56 falling inside the drought week ( $w$ ).  $T_{max_{d,i}}$  indicates the maximum temperature for that day,  
 57  $T_{25p}$  and  $T_{75p}$  are the 25<sup>th</sup> and 75<sup>th</sup> percentile of daily  $T_{max}$  during the summer period,  
 58 respectively. It is important to know that the CDHW severity is dimensionless as it is the product  
 59 of scPDSI (a standardized entity) and standardized maximum temperature.

60 Then the mean annual CDHW severity ('severity' in the main text) is calculated by taking the  
 61 average of events within the year. For example – if 3 CDHW events are observed with the  
 62 magnitude of severities 30, 40, and 50, then the mean annual CDHW severity is 40.

$$63 \quad Severity = \begin{cases} \frac{(\sum_{i=1}^{i=N} CDHWS_i)}{N} & \text{if } N \neq 0 \\ 0 & \text{if } N = 0 \end{cases} \quad (6)$$

64 Where,  $N$  is the total number of CDHW events observed for that particular year.

### 65 **A3. Calculation of area of grids**

66 The areas of the rectangular grids gradually decreases as we move from the equator to the higher  
 67 latitudes in both North and South direction. Therefore, an area correction is applied when  
 68 calculations involve the area of grids, for example, in calculating global mean of CDHW  
 69 characteristics and areal thresholds in Figure 1 (main manuscript). The present study calculates  
 70 the area of each rectangular  $2^\circ \times 2^\circ$  latitude-longitude grid, surrounded by  
 71  $[lon_1, lon_2, lat_1, lat_2]$  using the following mathematical expression  
 72 ([https://www.pmel.noaa.gov/maillists/tmap/ferret\\_users/fu\\_2004/msg00023.html](https://www.pmel.noaa.gov/maillists/tmap/ferret_users/fu_2004/msg00023.html)),

$$73 \quad A = \left( \frac{\pi \times R^2}{180} \right) \times |\sin(lat_1) - \sin(lat_2)| \times |lon_1 - lon_2| \quad (7)$$

74 Where,  $R = 6400 \text{ kms}$  is the equatorial radius of the earth.

75 In this paper, we have a total of 3347 global land area grids. After calculating the area of each  
 76 grid, the area of equatorial grid is divided to the area of every grid, which gives an area  
 77 correction factor ( $\gamma$ ) such that  $\gamma \in (0,1]$ .  $\gamma$  is equal to one for the equatorial grids since they have  
 78 the maximum area and for higher latitudes  $\gamma$  decreases.

### 79 **A4. Trend Analysis**

80 The interannual trend present in the different CDHW characteristics are evaluated using Sen's  
 81 slope estimator. Sen's slope estimate can be easily evaluated using the *scipy* library

82 (<https://docs.scipy.org/doc/scipy-1.7.0/reference/>) of *python 3.0*. The linear trends present are  
83 tested for significance based on Mann-Kendall's trend test. The detail descriptions of Sen's  
84 Slope estimation and Mann-Kendall test for significance are given in the following subsections.

#### 85 *A2.1. Calculation of Sen's Slope Estimator*

86 Theil-Sen, (1968)<sup>4</sup> developed a non-parametric method to find the true slope (change per unit  
87 time) present in univariate time series.

88 1. Slopes of the trend in a sample of N pairs of data are calculated as follows:

$$89 \quad Q_k = \frac{y_i - y_j}{x_i - x_j} \text{ for } k = 1, 2, \dots, N \quad (8)$$

90 Where,  $(x_i, y_i)$  and  $(x_j, y_j)$  are the data pairs out of the N pairs of data given that  $j >$   
91  $i$ .

92 2. Sen's slope estimate is calculated as the median of the N values of  $Q_i$  as follows:

$$93 \quad Q_{med} = \begin{cases} Q_{[\frac{N+1}{2}]}, & \text{if } N \text{ is odd} \\ \frac{1}{2}(Q_{[\frac{N}{2}]} + Q_{[\frac{N+2}{2}]}) & \text{if } N \text{ is even} \end{cases} \quad (9)$$

#### 94 *A2.2. Mann-Kendall's test*

95 Mann-Kendall's (MK) test<sup>5</sup> is a non-parametric test that statistically assesses if there is a  
96 monotonic upward or downward trend in the variable of interest over time. The MK test checks  
97 whether to reject the null hypothesis  $H_o$  and accept the alternative hypothesis  $H_a$ ,

98 where,  $H_o$  : *No Monotonic trend present in the series* vs.

99  $H_a$  : *There is a monotonic trend present in the series*

100 The Mann-Kendall's test statistic to test for significance is given by,

$$101 \quad Z_{MK} = \begin{cases} \frac{S-1}{\sqrt{Var(S)}} & \text{if } S > 0 \\ 0 & \text{if } S = 0 \\ \frac{S+1}{\sqrt{Var(S)}} & \text{if } S < 0 \end{cases} \quad (10)$$

102  $Z_{MK}$  is obtained from standard normal distribution.

$$103 \quad S = \sum_{i=1}^{n-1} \sum_{j=i+1}^n \text{sgn}(x_j - x_i) \quad (11)$$

104

$$105 \quad \text{sgn}(x_j - x_i) = \begin{cases} +1, & \text{if } x_j - x_i > 0 \\ 0, & \text{if } x_j - x_i = 0 \\ -1 & \text{if } x_j - x_i < 0 \end{cases} \quad (12)$$

106

$$107 \quad Var(S) = \frac{n(n-1)(2n+5) - \sum_{t=1}^m t_i(t_i-1)(2t_i+5)}{18} \quad (13)$$

108 Where,  $n$  is the length of the dataset,  $m$  is the number of tied groups, and  $t$  indicates the total  
 109 number of ties. Positive (or, negative) values of  $Z$  indicate increasing (or, decreasing) trends  
 110 present in the time series. The null hypothesis ( $H_o$ ) of no trend is rejected for of  $Z_{MK} \geq$   
 111  $z_{MK(1-\frac{\alpha}{2})}$ . The present study considers a significance level of  $\alpha = 0.01$ .

## 112 **A5. Calculation of Areal Thresholds**

113 First, we performed the area corrections of the grids provided in section A3. Before calculating  
 114 the areal thresholds, we calculated the yearly time series of CDHW frequency, duration, and  
 115 severity from 1982-2099 (118 years) for all the grids over the global land areas. Then, the area-  
 116 correction factor ( $\gamma$ ) of each grid is multiplied with the respective CDHW characteristics. For  
 117 this study, we have a total of 3347 grid points. Thus, we have a 118-by-3347 matrix; rows  
 118 represent the time, and columns represent the grid points.

119 For the calculation of areal thresholds for any CDHW characteristics, follow these steps:

120 (1) Calculate the 20<sup>th</sup>, 40<sup>th</sup>, 60<sup>th</sup>, and 80<sup>th</sup> percentiles for the first row (i.e., for the year 1982).

121 Here, the 80<sup>th</sup> percentile value represents that at least 20% of the global land areas are  
122 witnessing CDHW characteristic (frequency, duration, or severity) greater than that  
123 value.

124 (2) Calculate these values for all 118 years. Now, we get a time series for all the four  
125 percentiles, plotted in Figure 1 (d-f; main text).

126

## 127 **A6. Area vs. frequency curves**

128 1. For a climate division, the return periods for all the grid points are first segregated into  $N$   
129 (a minimum value of 50 is recommended) number of bins. This is done using the  
130 “*histcount*” command in MATLAB.

131 2. Then we calculated the number of grid points having RP more than or equal to a  
132 particular RP value by taking the sum of histogram frequency.

133 3. The percentage of area affected is calculated by dividing the total number of grid points,  
134 and these values are smoothed using a 7- year running mean.

135

136

137

138

139

140

141

142

143

144

145

146

147

148

149

150

151



## Figures

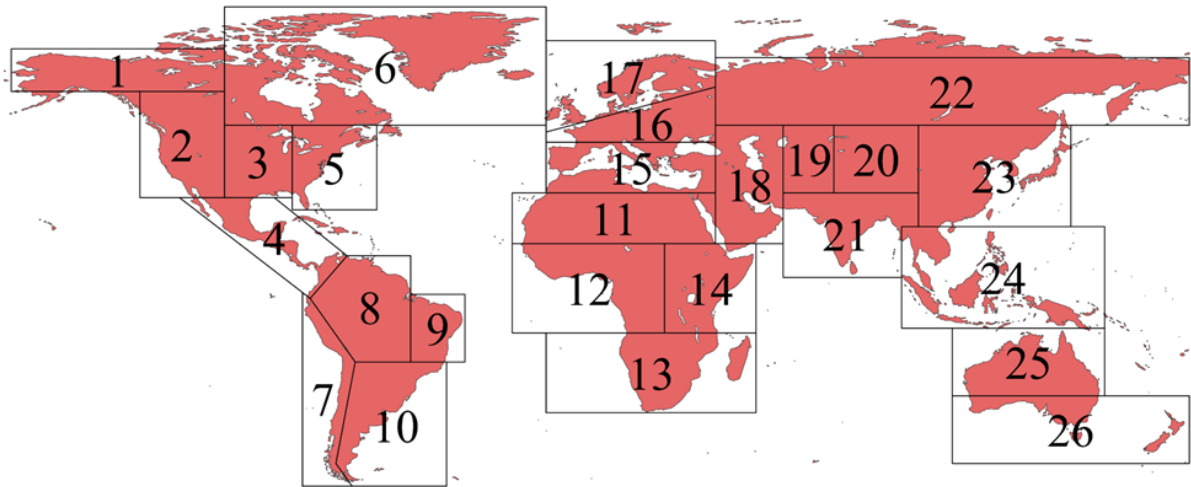

1. Alaska (ALA)
2. West North America (WNA)
3. Central North America (CNA)
4. Central America/Mexico (CAM)
5. Canada/Greenland/Iceland (CGI)
6. East North America (ENA)
7. West Coast South America (WSA)
8. Amazon (AMZ)
9. North-East Brazil (NEB)
10. Southeastern South America (SSA)
11. Sahara (SAH)
12. West Africa (WAF)
13. Southern Africa (SAF)
14. East Africa (EAF)
15. Mediterranean (MED)
16. Central Europe (CEU)
17. North Europe (NEU)
18. West Asia (WAS)
19. Central Asia (CAS)
20. Tibetan Plateau (TIB)
21. South Asia (SAS)
22. North Asia (NAS)
23. East Asia (EAS)
24. Southeast Asia (SEA)
25. North Australia (NAU)
26. South Australia/New Zealand (SAU)

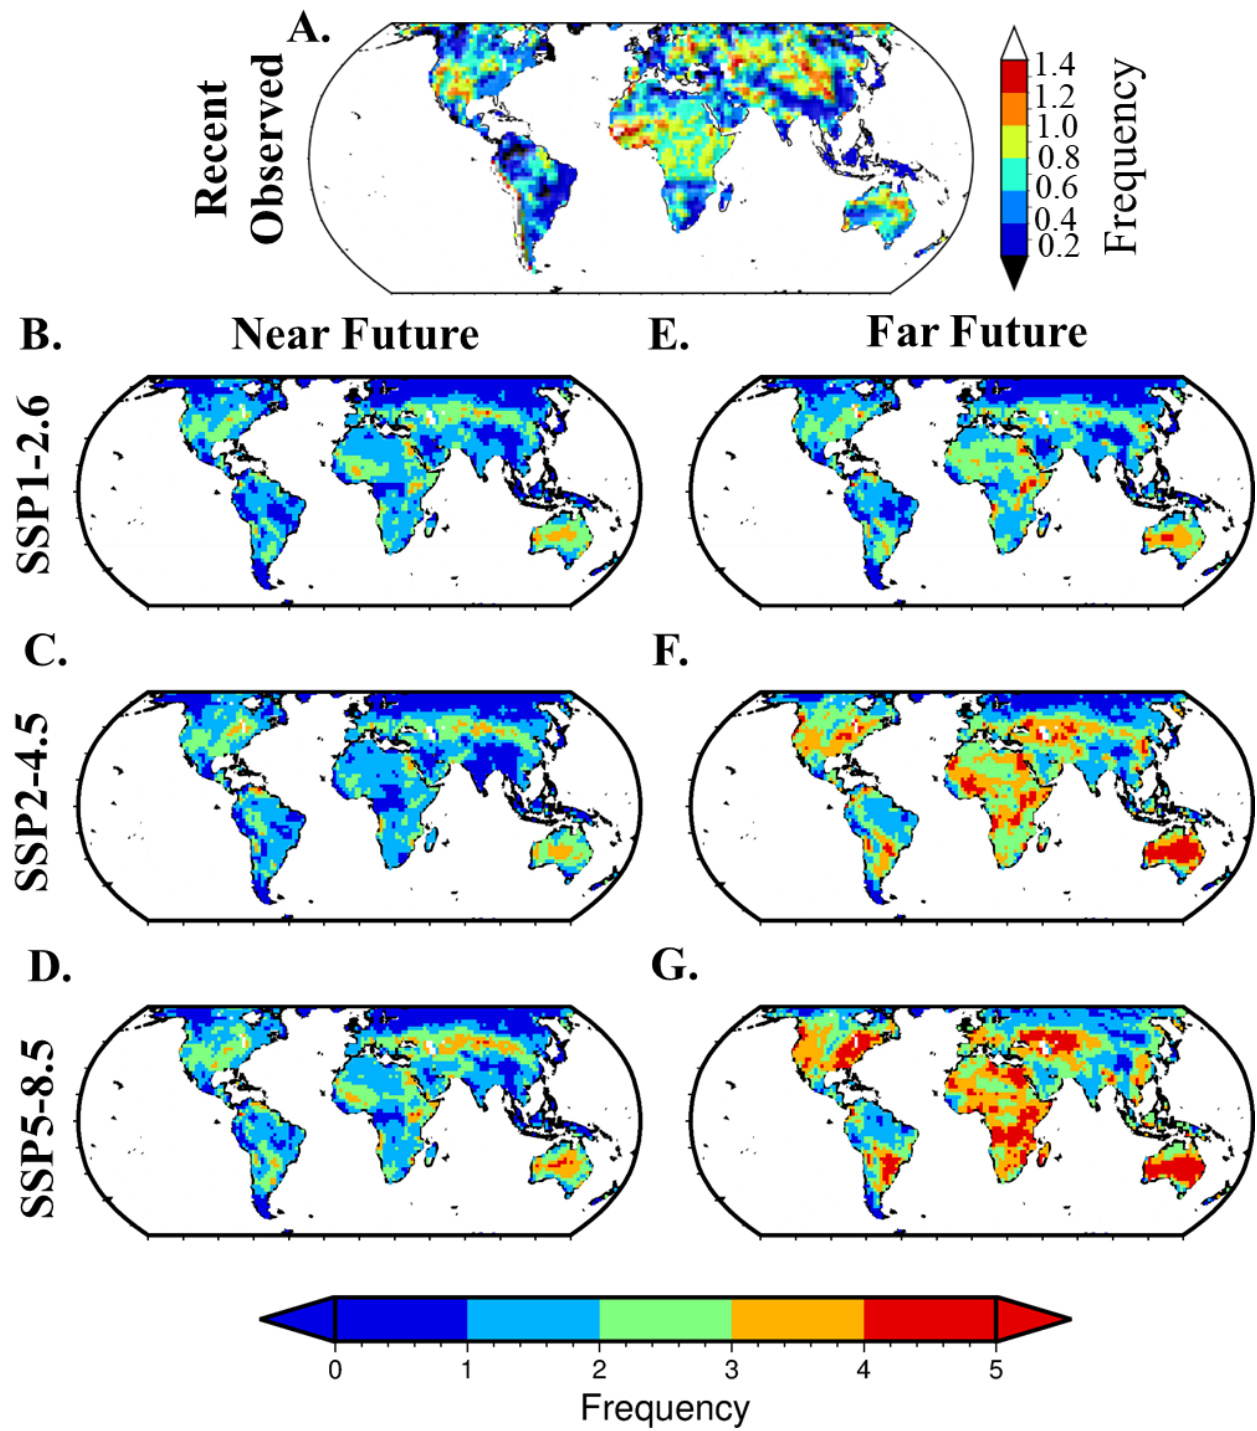

155

156 **Figure S2** Spatial map showing the frequency CDHW events for (a) recent observed period (1982-2020),  
 157 (b) SSP1-2.6 near-future (2021-2057), (c) SSP2-4.5 near-future (2021-2057), (d) SSP5-8.5 near-future  
 158 (2021-2057), (e) SSP1-2.6 far-future (2058-2095), (f) SSP2-4.5 far-future (2058-2095), (g) SSP5-8.5 far-  
 159 future (2058-2095).

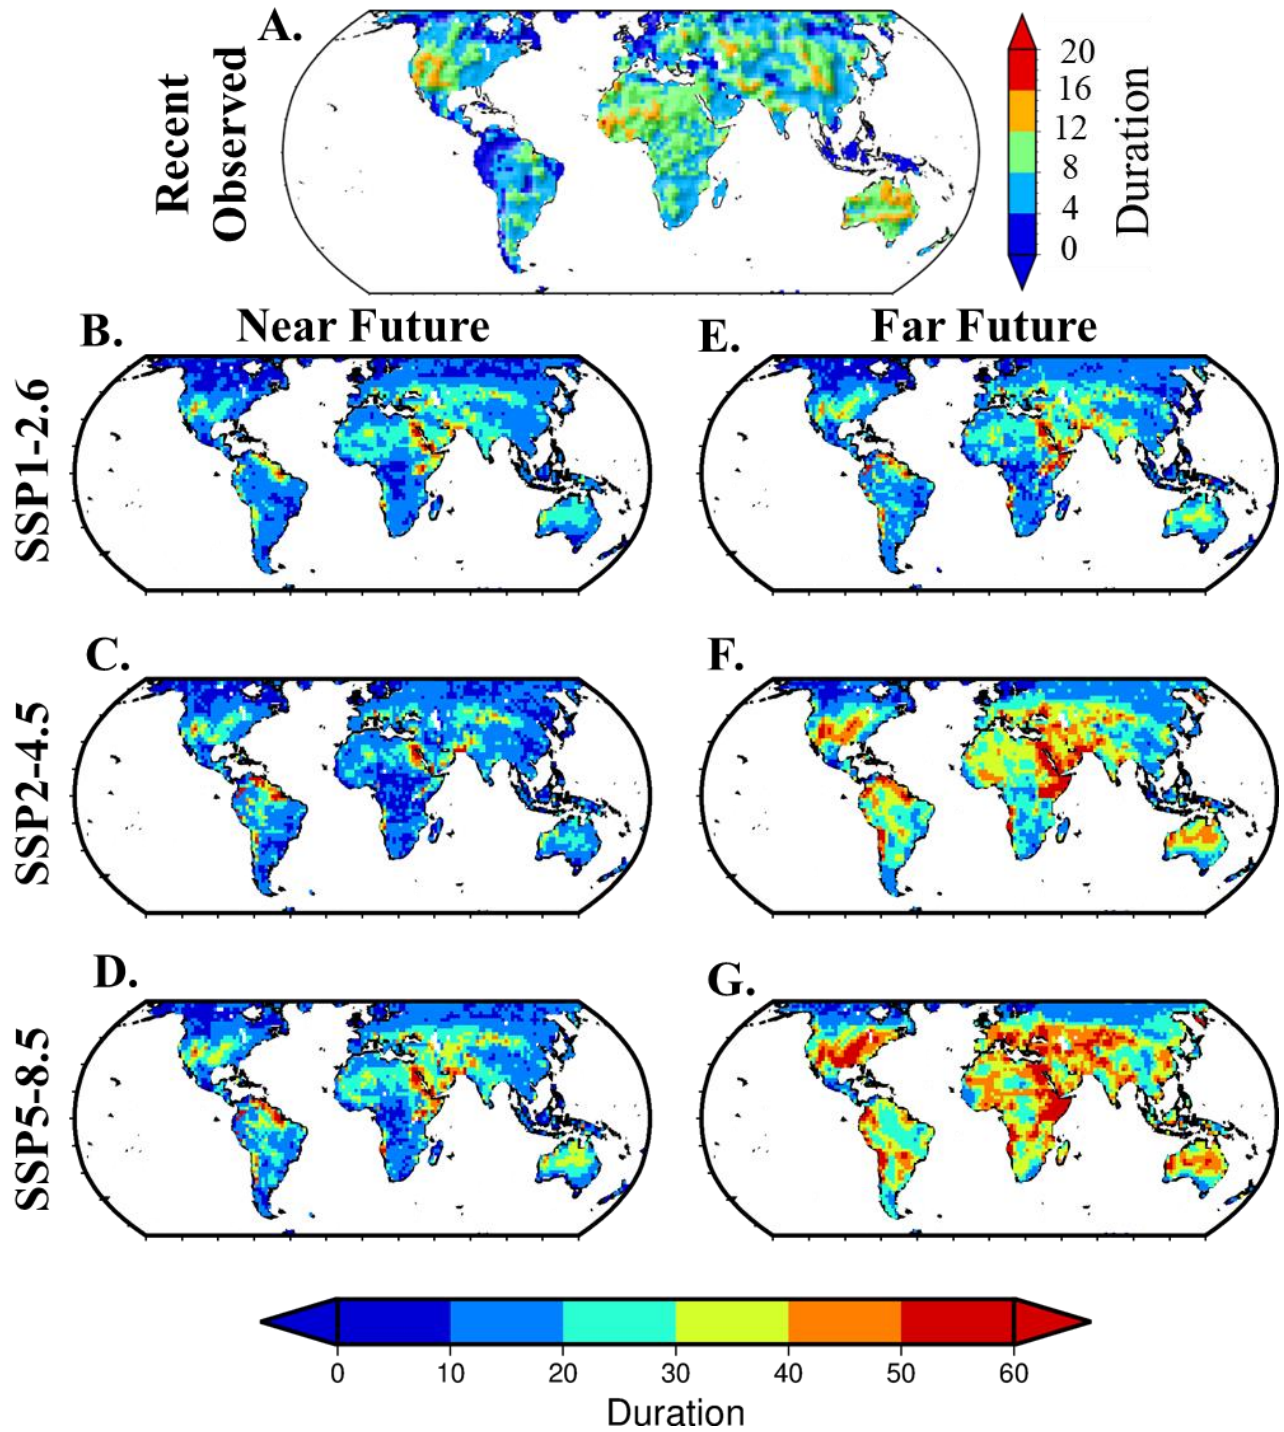

160

161 **Figure S3** Spatial map showing the duration of CDHW events for (a) recent observed period (1982-  
 162 2020), (b) SSP1-2.6 near-future (2021-2057), (c) SSP2-4.5 near-future (2021-2057), (d) SSP5-8.5 near-  
 163 future (2021-2057), (e) SSP1-2.6 far-future (2058-2095), (f) SSP2-4.5 far-future (2058-2095), (g) SSP5-  
 164 8.5 far-future (2058-2095).



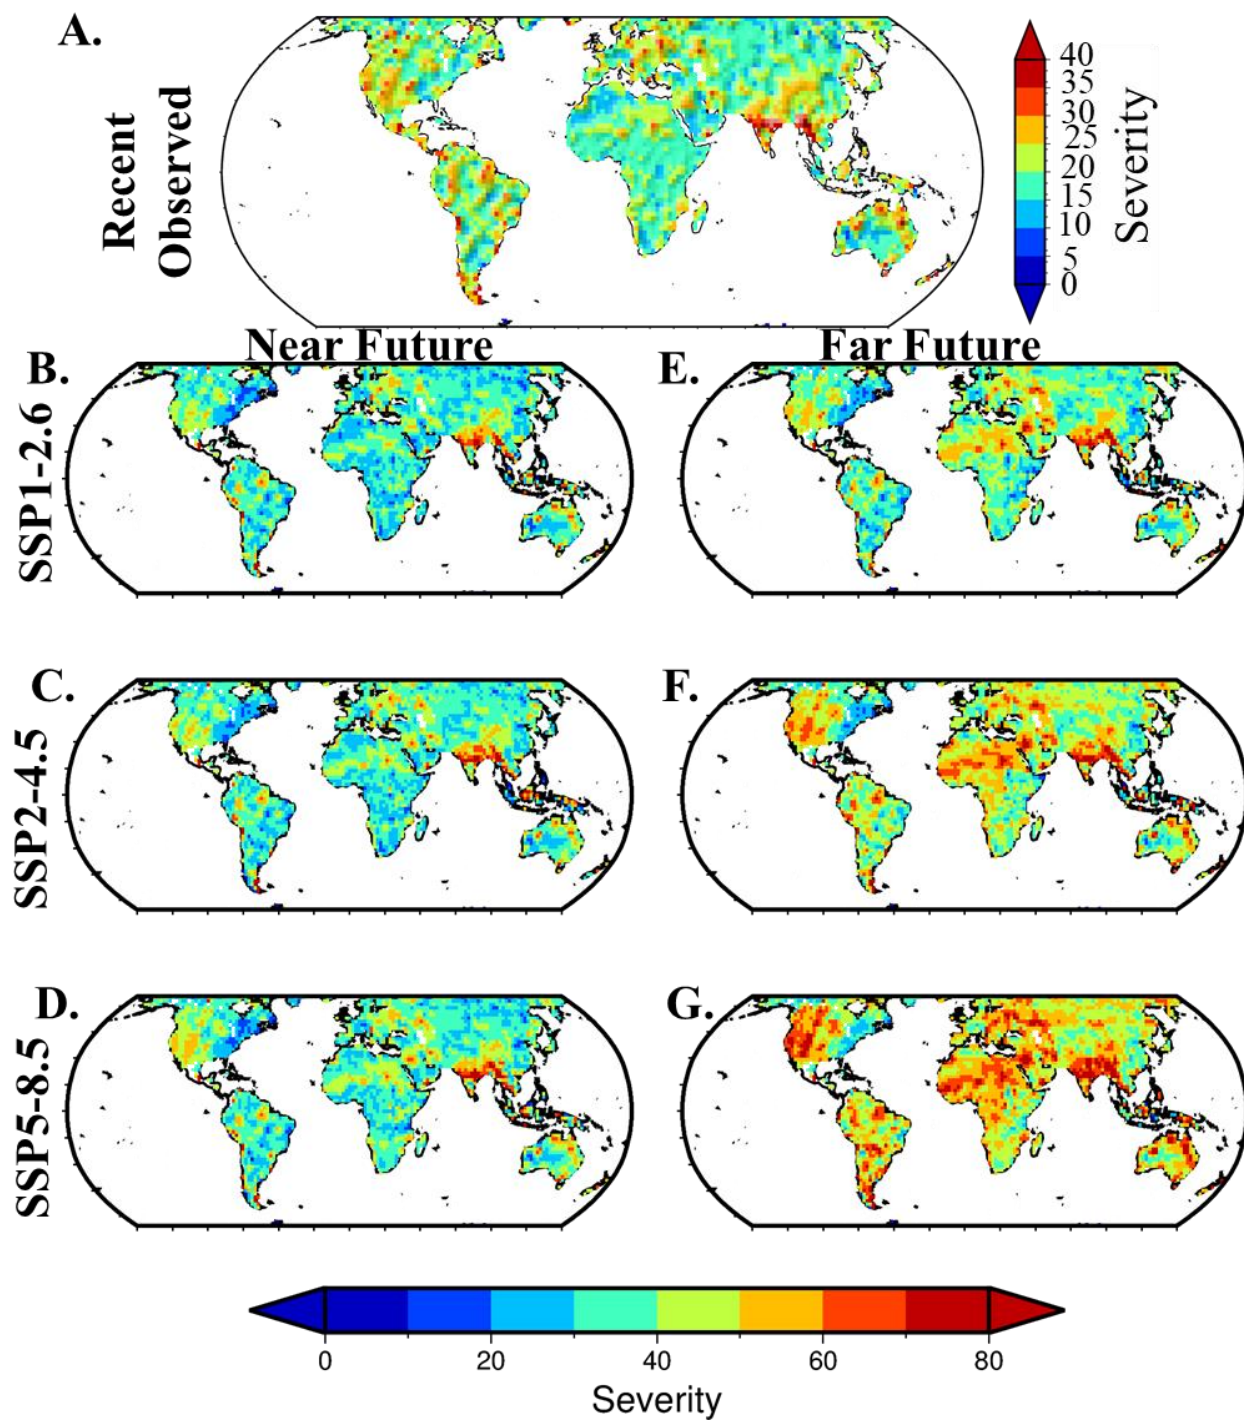

166

167 *Figure S4* Spatial map showing the CDHW severity for (a) recent observed period (1982-2020), (b)168 *SSP1-2.6 near-future (2021-2057), (c) SSP2-4.5 near-future (2021-2057), (d) SSP5-8.5 near-future*169 *(2021-2057), (e) SSP1-2.6 far-future (2058-2095), (f) SSP2-4.5 far-future (2058-2095), (g) SSP5-8.5 far-*170 *future (2058-2095).*

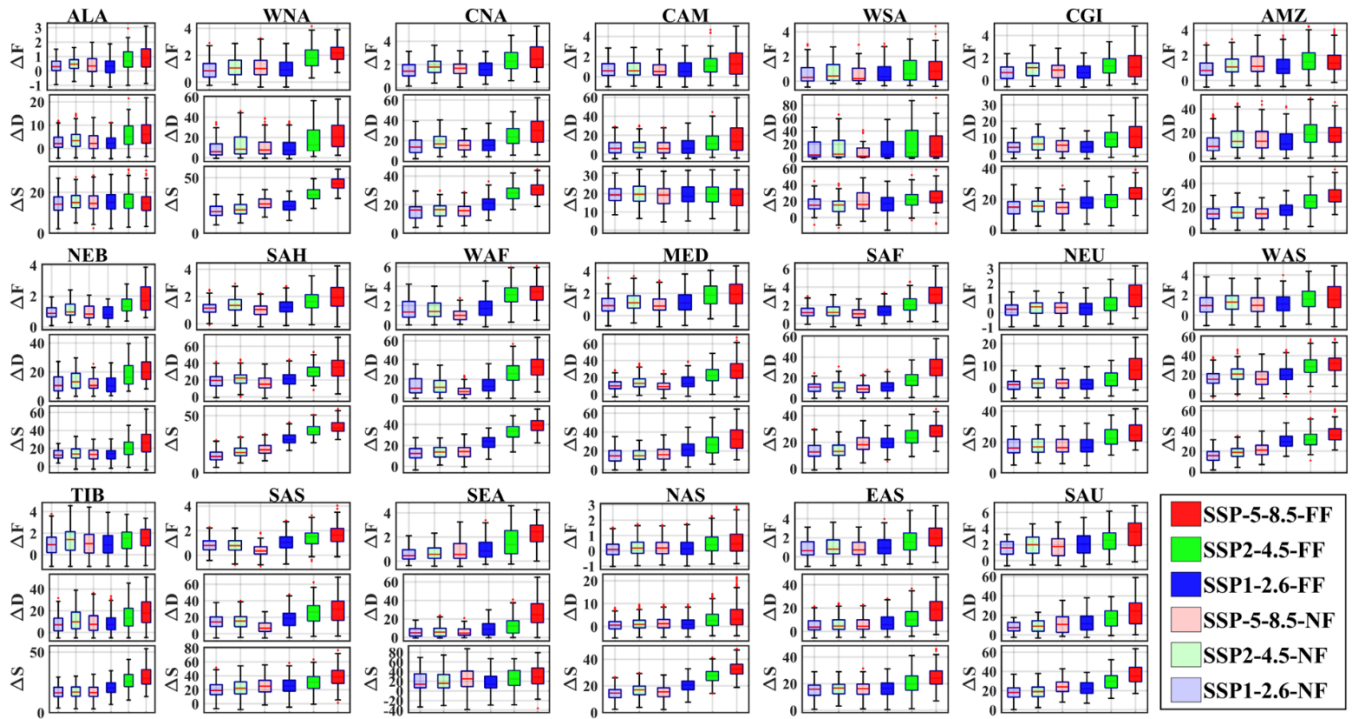

171

172 **Figure S5.** Boxplots indicate the change in different CDHW metrics relative to recent observed period  
 173 (top: frequency, middle: duration, and bottom: severity of each 3 by 1 subplot) are shown by SSP1-2.6-  
 174 NF (light blue), SSP2-4.5-NF (light green), SSP5-8.5-NF (light red), SSP1-2.6-FF (dark blue), SSP2-4.5-  
 175 FF (dark green), and SSP5-8.5-FF (dark red) for the twenty AR5 climate regions. Note that on the y-  
 176 axis, the labels  $\Delta F$ ,  $\Delta D$ , and  $\Delta S$  represent the change in frequency, change in duration, and change in  
 177 severity, respectively, relative to the recently observed period (1982 to 2019).

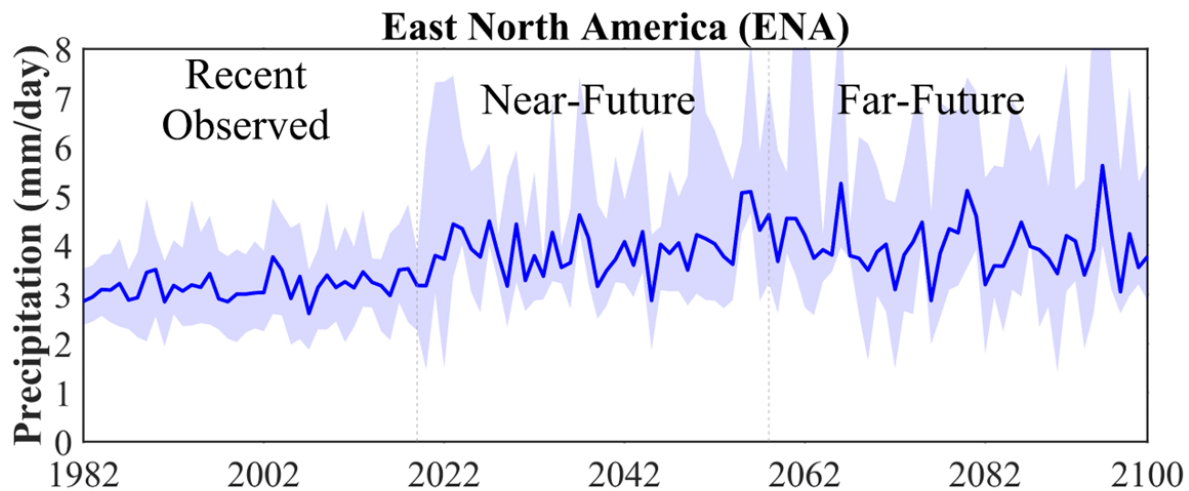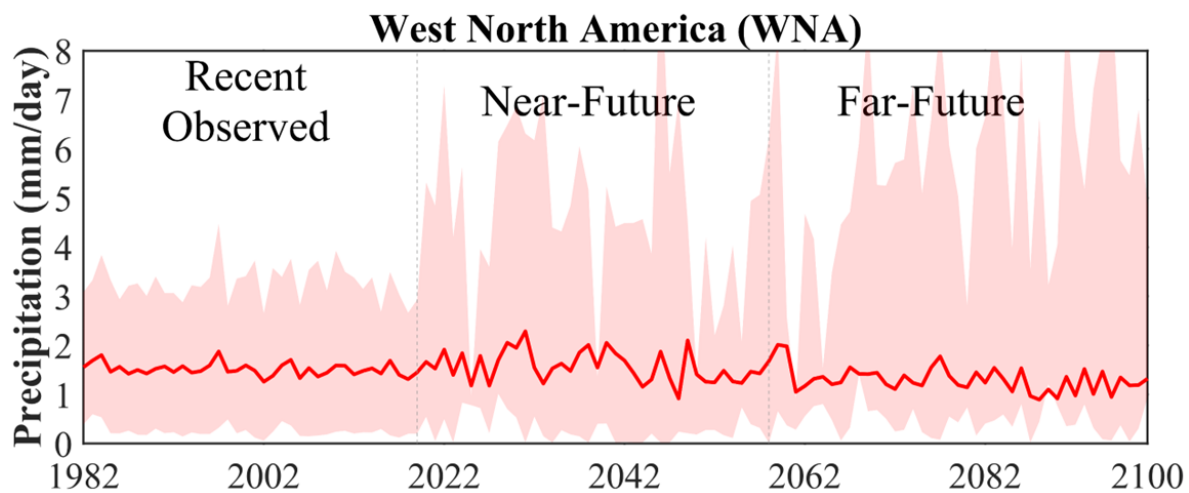

178

179 *Figure S6: This figure presents the summer mean precipitation trends in East North America and*  
 180 *West North America spanning from 1982 to 2100. Precipitation data for the period 1982-2019 is*  
 181 *derived from the Global Precipitation Climatology Centre (GPCC) records, while data for the*  
 182 *years beyond 2020 is based on the multimodel mean ensemble projections from the Shared*  
 183 *Socioeconomic Pathways 5-8.5 (SSP-5-8.5) scenario of the CMIP6 GCMs.*

184

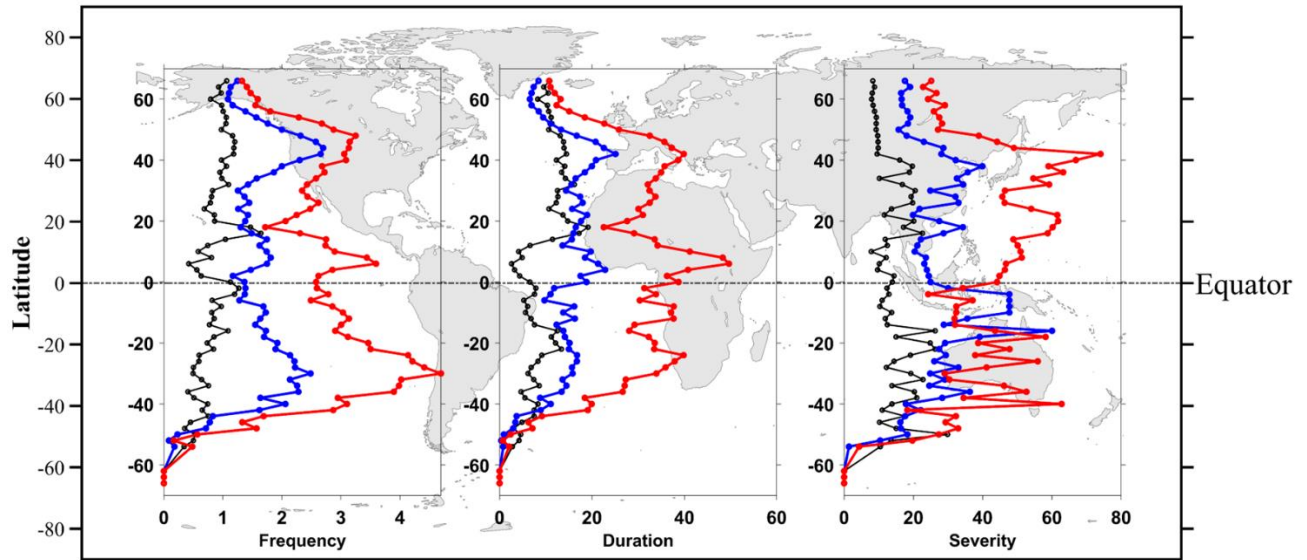

185

186 **Figure S7.** Latitudinal variations of the CDHW characteristics — Frequency (left), Duration  
 187 (middle), Severity (right) — are shown for recent observed period (black), SSP5-8.5 near-future  
 188 (blue), and SSP5-8.5 far-future (red).

189

190

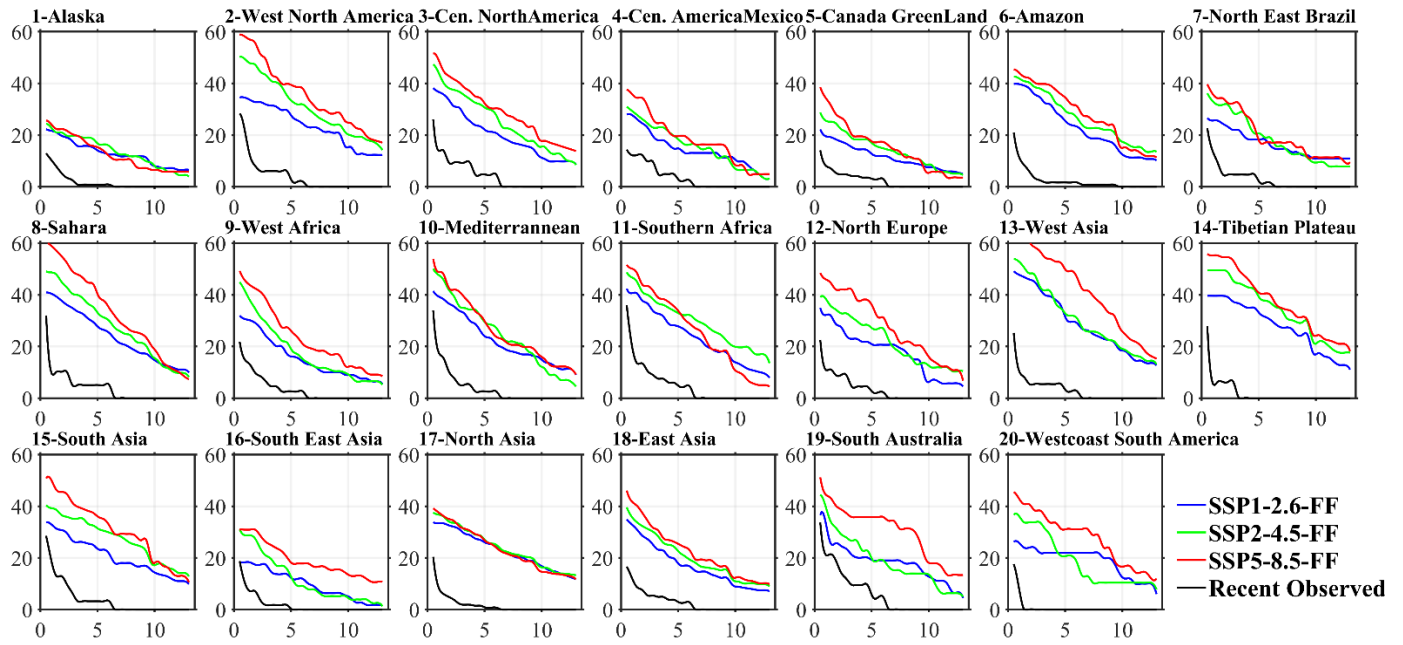

191

192 **Figure S8.** Percentage of area (y-axis) versus return period (x-axis) curves for different climate regions  
 193 are shown for the recent observed period (black dotted line), SSP1-2.6 (solid blue line), SSP2-4.5 (solid  
 194 green line), SSP5-8.5 (solid red line). The curves are smoothed using a 7- year running mean.

195

196

197

198

199

200

201

202

203



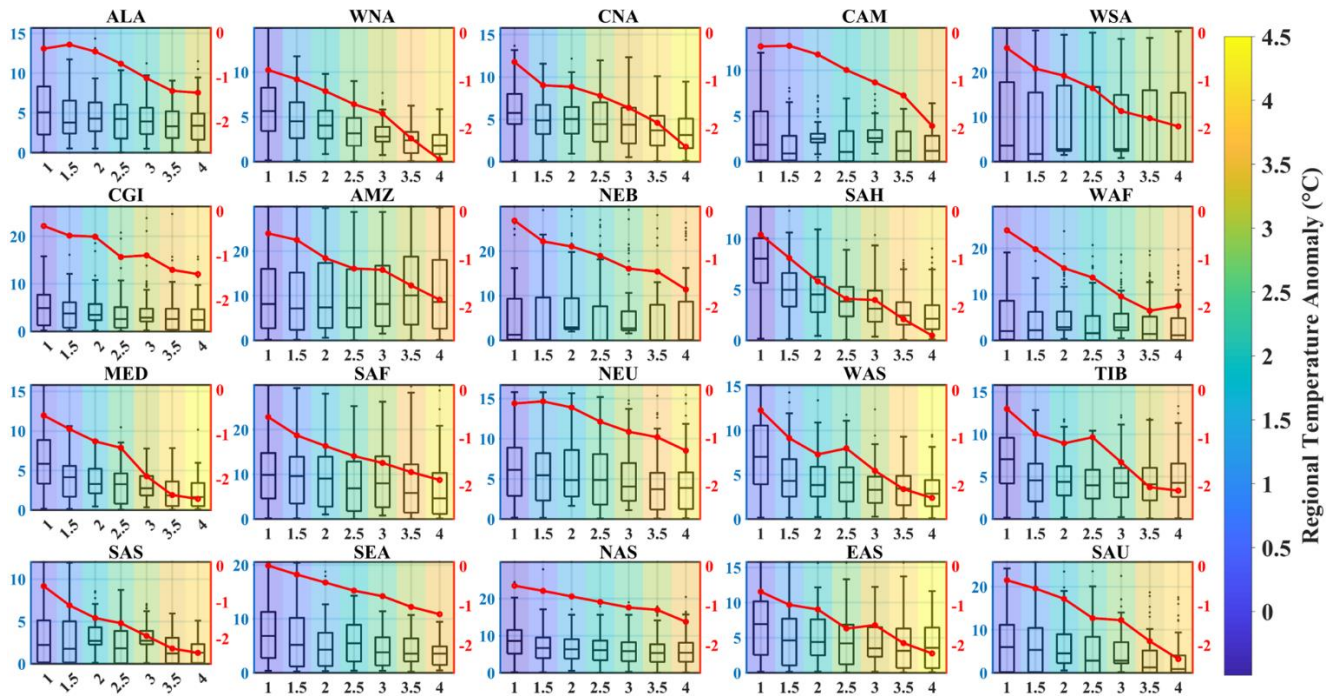

204

205 **Figure S9.** Boxplots indicating the return periods (y-axis, left) of the CDHW events corresponding to  
 206 different global mean temperature anomalies (x-axis) for 20 climate regions at different global warming  
 207 levels. The color patch indicates the regional warming anomaly for a particular global warming  
 208 anomaly. The red line specifies the sc-PDSI values (y-axis, right) during these periods.

209

210

211

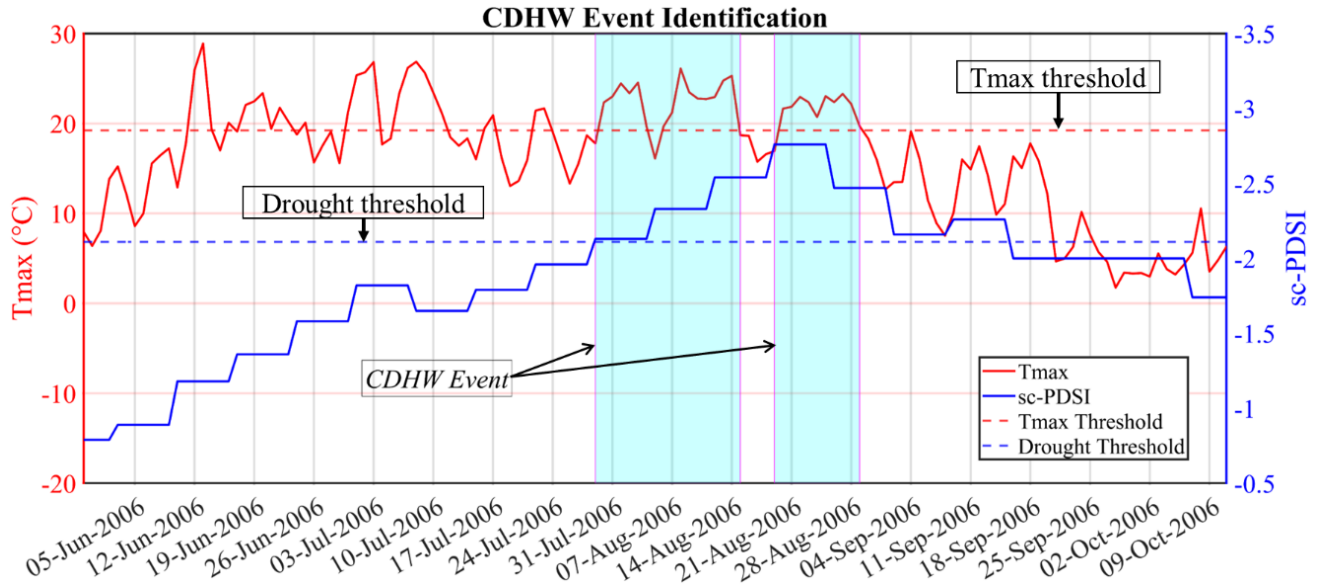

212  
 213 **Figure S10.** This figure presents the daily maximum temperature (left y-axis) and weekly sc-  
 214 PDSI time series (right y-axis) for a specific grid location (Lon= 25°E and Lat = 60°N)  
 215 during the summer of 2006. The drought threshold is defined as the 10th percentile of the weekly  
 216 sc-PDSI for the recent observed period (1982-2019), while the heatwave threshold corresponds  
 217 to the 95th percentile of daily maximum temperature during the same period. In this example,  
 218 two compound drought and heatwave events, illustrated by the shaded yellow areas, are  
 219 identified when both drought and heatwave conditions simultaneously exceed their respective  
 220 thresholds.

221

222

223

224

225

## Tables

226 *Table S1. List of CMIP6 GCMs considered in the study*

227

| SI No. | GCM Name      | Realization | Original Resolution<br>(Lat X Lon) |
|--------|---------------|-------------|------------------------------------|
| 1      | ACCESS-CM2    | r1i1p1f1    | 1.25 × 1.875                       |
| 2      | ACCESS-ESM1-5 |             | 1.25 × 1.875                       |
| 3      | CanESM5       |             | 2.8 × 2.8                          |
| 4      | MIROC6        |             | 1.4 × 1.4                          |
| 5      | MPI-ESM1-2-HR |             | 0.9375 × 0.9375                    |
| 6      | MPI-ESM1-2-LR |             | 1.875 × 1.875                      |
| 7      | MRI-ESM2-0    |             | 1.125 × 1.125                      |
| 8      | NorESM2-MM    |             | 0.9 × 1.25                         |

228

229

230

231

232

233

234

235 *Table S2. Mann-Kendall test results with  $\alpha = 0.01$  level of significance and Sen's slope values*  
 236 *for different CDHW characteristics.  $H=1$  ( $H=0$ ) indicates there is (not) a statistically significant*  
 237 *trends present in the series.*

| Scenarios   | CDHW Events |             |   | CDHW Days |             |   | CDHW Severity |             |   |
|-------------|-------------|-------------|---|-----------|-------------|---|---------------|-------------|---|
|             | Slope       | P-value     | H | Trend     | P-value     | H | Slope         | P-value     | H |
| Observation | 0.011       | $<10^{-9}$  | 1 | 0.05      | $<10^{-6}$  | 1 | 0.17          | $<10^{-7}$  | 1 |
| SSP126 NF   | 0.01        | $<10^{-9}$  | 1 | 0.021     | $<10^{-9}$  | 1 | 0.5           | $<10^{-9}$  | 1 |
| SSP245 NF   | 0.014       | $<10^{-10}$ | 1 | 0.151     | $<10^{-14}$ | 1 | 0.49          | $<10^{-9}$  | 1 |
| SSP585 NF   | 0.016       | $<10^{-14}$ | 1 | 0.155     | $<10^{-15}$ | 1 | 0.396         | $<10^{-9}$  | 1 |
| SSP126 FF   | -0.0003     | 0.18        | 0 | 0.03      | 0.0032      | 1 | 0.06          | 0.16        | 0 |
| SSP245 FF   | 0.013       | $<10^{-9}$  | 1 | 0.12      | $<10^{-15}$ | 1 | 0.593         | $<10^{-10}$ | 1 |
| SSP585 FF   | 0.028       | $<10^{-14}$ | 1 | 0.45      | $<10^{-19}$ | 1 | 2.53          | $<10^{-14}$ | 1 |

238

239

240

241

242

243

244

245

246

247 **References**

- 248 1. Miao, C., Su, L., Sun, Q. & Duan, Q. A nonstationary bias-correction technique to remove  
249 bias in GCM simulations. *J. Geophys. Res. Atmospheres* **121**, 5718–5735 (2016).
- 250 2. Wang, L. & Chen, W. A CMIP5 multimodel projection of future temperature, precipitation,  
251 and climatological drought in China. *Int. J. Climatol.* **34**, 2059–2078 (2014).
- 252 3. Mukherjee, S. & Mishra, A. K. Increase in Compound Drought and Heatwaves in a Warming  
253 World. *Geophys. Res. Lett.* **48**, e2020GL090617 (2021).
- 254 4. Sen, P. K. Estimates of the Regression Coefficient Based on Kendall’s Tau. *J. Am. Stat.*  
255 *Assoc.* **63**, 1379–1389 (1968).
- 256 5. Mann, H. B. Nonparametric Tests Against Trend. *Econometrica* **13**, 245–259 (1945).

257

258

259

260

261
